# Supplementary material for: Genetic ancestry and population structure of vaccinia virus
Source: PubMed Central journal article supplement (PMC9372083; doi:10.1038/s41541-022-00519-4), 2022-08-11
Supplement: 41541_2022_519_MOESM1_ESM.pdf [file 41541_2022_519_MOESM1_ESM.pdf]

## Supplementary Files

### Genetic ancestry and population structure of vaccinia virus

Cristian Molteni<sup>1\*</sup>, Diego Forni<sup>1</sup>, Rachele Cagliani<sup>1</sup>, Mario Clerici<sup>2,3</sup>, Manuela Sironi<sup>1</sup>

\*corresponding author

<sup>1</sup>IRCCS E. MEDEA, Bioinformatics, Bosisio Parini, Italy

<sup>2</sup>University of Milan, Milan, Italy;

<sup>3</sup>Don C. Gnocchi Foundation ONLUS, IRCCS, Milan, Italy.

**Corresponding author:** Cristian Molteni, Bioinformatics - Scientific Institute IRCCS E. MEDEA, 23842 Bosisio Parini, Italy. e-mail: [cristian.molteni@lanostrafamiglia.it](mailto:cristian.molteni@lanostrafamiglia.it)

#### Supplementary Figures:

**Supplementary Figure 1.**  $\Delta K$  analysis

**Supplementary Figure 2.** Ancestral component probabilities at nucleotide resolution

#### Supplementary Tables:

**Supplementary Table 1.** List of analyzed strains

**Supplementary Table 2.** Cowpox and variola virus strains used for the phylogenetic network analysis

**Supplementary Table 3.** List of genes that are not or only partially covered by PIs

**Supplementary Figure 1.**  $\Delta K$  analysis. Identification of the optimal K for STRUCTURE analysis using the  $\Delta K$  method.

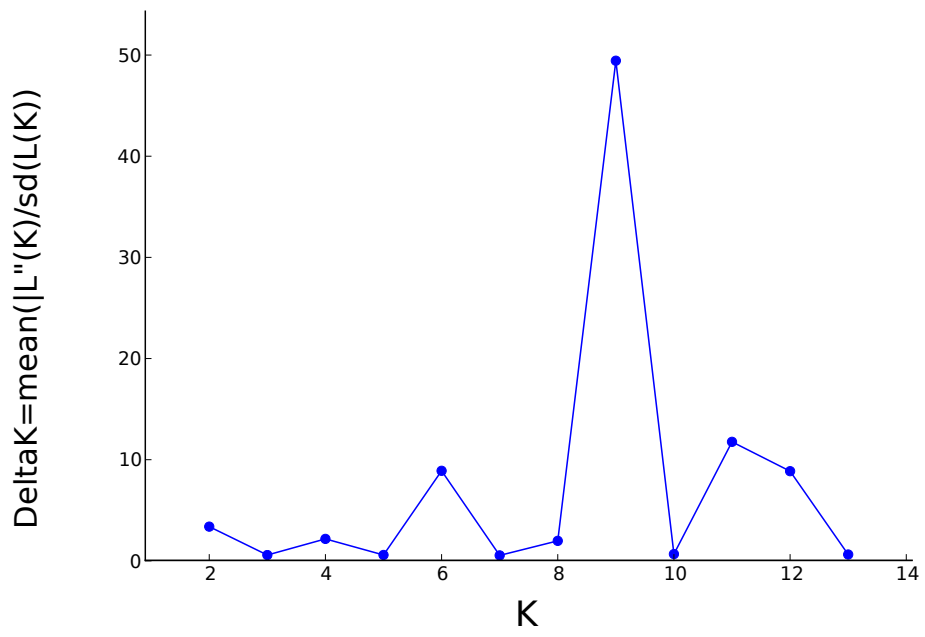

**Supplementary Figure 2. Ancestral component probabilities at nucleotide resolution.** Each line represents a randomly selected virus for each of the vaccine stocks/groups of VACV; each dot represents a PI site with a probability >0.75 to derive from Lister component. Color is the same as in Figure 3. Positions refer to the genome alignment.

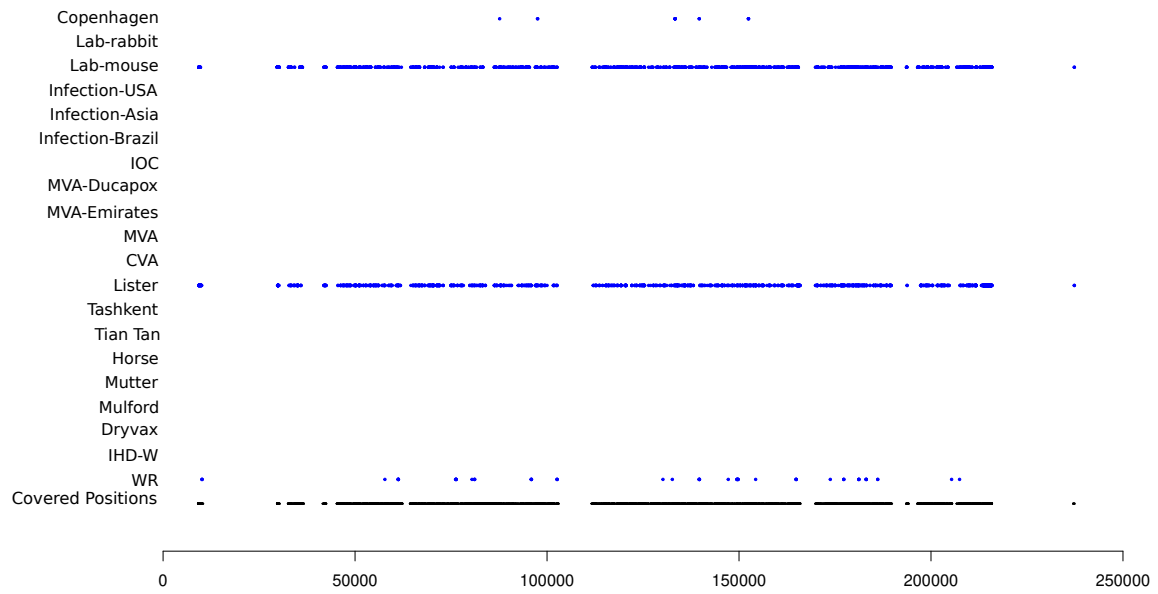

**Supplementary Table 1. List of analyzed strains.**

| <b>Accession</b> | <b>Strain</b>                                     | <b>Vaccine name/Type</b> |
|------------------|---------------------------------------------------|--------------------------|
| M35027           | Copenhagen                                        | Copenhagen               |
| AM501482         | CVA (parental virus of MVA)                       | CVA                      |
| AY313847         | acambis clone 2000                                | Dryvax                   |
| DQ377945         | 3737                                              | Dryvax                   |
| JN654985         | DPP20                                             | Dryvax                   |
| JN654979         | DPP12                                             | Dryvax                   |
| JN654981         | DDP15                                             | Dryvax                   |
| JN654982         | DPP16                                             | Dryvax                   |
| JN654983         | DPP17                                             | Dryvax                   |
| JN654978         | DPP11                                             | Dryvax                   |
| JN654976         | DPP9                                              | Dryvax                   |
| JN654977         | DPP10                                             | Dryvax                   |
| AY313848         | acambis clone 3                                   | Dryvax                   |
| JN654984         | DPP19                                             | Dryvax                   |
| KJ125438         | DPP25                                             | Dryvax                   |
| JN654986         | DPP21                                             | Dryvax                   |
| DQ439815         | Duke                                              | Dryvax                   |
| JN654980         | DDP13                                             | Dryvax                   |
| DQ792504         | MNR-76                                            | HPXV                     |
| KJ125439         | IDH-W1                                            | IHD-W                    |
| KC201194         | IDH-W                                             | IHD-W                    |
| MG599038         | Karachi 2005                                      | Infection-Asia           |
| MK239753         | NIV143262                                         | Infection-Asia           |
| MK239754         | NIV116233                                         | Infection-Asia           |
| MK239755         | NIV116234                                         | Infection-Asia           |
| MW883890         | BPXV/buffalo/India/2011/<br>Meerut-1/Control/P40  | Infection-Asia           |
| MW883891         | BPXV/buffalo/India/2011/<br>Meerut-1/CGP57380/P40 | Infection-Asia           |
| MW883892         | BPXV/buffalo/India/2011/<br>Meerut-1/P0           | Infection-Asia           |
| KT013210         | Cantagalo virus CM01                              | Infection-Brazil         |
| MW018153         | Cantagalo MI233                                   | Infection-Brazil         |
| MW018154         | Cantagalo VI04                                    | Infection-Brazil         |
| MW018155         | Cantagalo CG04                                    | Infection-Brazil         |
| MW018156         | Cantagalo ALEH2                                   | Infection-Brazil         |
| KF179385         | Serro 2                                           | Infection-Brazil         |
| MT227314         | Acambis/2019                                      | Infection-USA            |
| KT184691         | VACV-IOC-B388                                     | IOC                      |
| KT184690         | VACV-IOC-B141                                     | IOC                      |
| KF866253         | WAU86/88-1                                        | Lab-mouse                |
| AY484669         | Rabbitpox                                         | Lab-rabbit               |
| KX061501         | Butantan                                          | Lister                   |
| EU410304         | GLV-1h68                                          | Lister                   |
| DQ121394         | VACV107                                           | Lister                   |
| AY678276         | VACV-LO                                           | Lister                   |

|           |                                           |              |
|-----------|-------------------------------------------|--------------|
| AY678275  | LC16m8                                    | Lister       |
| AY678277  | LC16m0                                    | Lister       |
| MF477237  | Mulford 1902                              | Mulford      |
| MN369532  | VK01                                      | Mutter       |
| AY603355  | acambis clone 3000                        | MVA          |
| U94848    | MVA                                       | MVA          |
| DQ983236  | MVA-1721                                  | MVA          |
| DQ983237  | MVA-572                                   | MVA          |
| DQ983238  | MVA-BN                                    | MVA          |
| MT648498  | Ducapox vaccine (batch number<br>DPV0816) | MVA-Ducapox  |
| MT946551  | Ducapox vaccine (batch<br>number DPV0818) | MVA-Emirates |
| KM044309  | TK3                                       | Tashkent     |
| KM044310  | TK4                                       | Tashkent     |
| JX489136  | TT09                                      | Tian Tan     |
| KC207811  | TP05                                      | Tian Tan     |
| JX489135  | TT08                                      | Tian Tan     |
| JX489137  | TT10                                      | Tian Tan     |
| JX489138  | TT11                                      | Tian Tan     |
| JX489139  | TT12                                      | Tian Tan     |
| KC207810  | TP03                                      | Tian Tan     |
| NC_006998 | WR                                        | WR           |

---

**Supplementary Table 2. Cowpox and variola virus strains used for the phylogenetic network analysis.**

| <b>Accession</b> | <b>Species</b> |
|------------------|----------------|
| MK035746         | cowpox virus   |
| KC813508         | cowpox virus   |
| LN864565         | cowpox virus   |
| MK035747         | cowpox virus   |
| KC813501         | cowpox virus   |
| KC813503         | cowpox virus   |
| KC813505         | cowpox virus   |
| KC813512         | cowpox virus   |
| MK035748         | cowpox virus   |
| MK035750         | cowpox virus   |
| MK035753         | cowpox virus   |
| MK035757         | cowpox virus   |
| MK035759         | cowpox virus   |
| MK035749         | cowpox virus   |
| KC813510         | cowpox virus   |
| HQ420895         | cowpox virus   |
| MK035751         | cowpox virus   |
| MK035758         | cowpox virus   |
| KY549146         | cowpox virus   |
| KY549147         | cowpox virus   |
| MK035755         | cowpox virus   |
| MK035754         | cowpox virus   |
| MK035756         | cowpox virus   |
| KC813495         | cowpox virus   |
| LT896719         | cowpox virus   |
| MK035752         | cowpox virus   |
| KC813502         | cowpox virus   |
| KC813509         | cowpox virus   |
| KC813491         | cowpox virus   |
| LT993231         | cowpox virus   |
| LT896728         | cowpox virus   |
| LT896723         | cowpox virus   |
| LT993230         | cowpox virus   |
| KC813506         | cowpox virus   |
| LT993228         | cowpox virus   |
| LN879483         | cowpox virus   |
| LT896726         | cowpox virus   |
| HQ420898         | cowpox virus   |
| LT993232         | cowpox virus   |
| LT896733         | cowpox virus   |
| LT896718         | cowpox virus   |

|           |              |
|-----------|--------------|
| KC813507  | cowpox virus |
| KC813511  | cowpox virus |
| LT896732  | cowpox virus |
| LT896720  | cowpox virus |
| LT896729  | cowpox virus |
| LT896731  | cowpox virus |
| KC813496  | cowpox virus |
| LT896725  | cowpox virus |
| LT896727  | cowpox virus |
| LT896730  | cowpox virus |
| KC813504  | cowpox virus |
| KC813497  | cowpox virus |
| KC813492  | cowpox virus |
| KC813498  | cowpox virus |
| KC813500  | cowpox virus |
| KY463519  | cowpox virus |
| KY569020  | cowpox virus |
| KY569022  | cowpox virus |
| KY569021  | cowpox virus |
| KY569018  | cowpox virus |
| KY569019  | cowpox virus |
| KC813494  | cowpox virus |
| HQ420897  | cowpox virus |
| HQ420894  | cowpox virus |
| KY549149  | cowpox virus |
| HQ420896  | cowpox virus |
| KY549144  | cowpox virus |
| LT896724  | cowpox virus |
| KY549145  | cowpox virus |
| KC813499  | cowpox virus |
| LN864566  | cowpox virus |
| HQ420899  | cowpox virus |
| KY549150  | cowpox virus |
| LT896722  | cowpox virus |
| KY549148  | cowpox virus |
| HQ420900  | cowpox virus |
| LT883663  | cowpox virus |
| DQ437593  | cowpox virus |
| LT993226  | cowpox virus |
| NC_003663 | cowpox virus |
| KY549151  | cowpox virus |
| KC813493  | cowpox virus |
| KY549143  | cowpox virus |
| HQ407377  | cowpox virus |
| HQ420893  | cowpox virus |

|           |               |
|-----------|---------------|
| X94355    | cowpox virus  |
| KY369926  | cowpox virus  |
| LT896721  | cowpox virus  |
| LR812035  | cowpox virus  |
| P328      | variola virus |
| KY358055  | variola virus |
| DQ437584  | variola virus |
| DQ441416  | variola virus |
| DQ441426  | variola virus |
| DQ441437  | variola virus |
| DQ441434  | variola virus |
| DQ441447  | variola virus |
| DQ441419  | variola virus |
| Y16780    | variola virus |
| DQ437590  | variola virus |
| NC_001611 | variola virus |
| DQ441432  | variola virus |
| DQ437582  | variola virus |
| DQ441430  | variola virus |
| DQ441444  | variola virus |
| DQ441442  | variola virus |
| DQ437591  | variola virus |
| DQ441428  | variola virus |
| DQ441429  | variola virus |
| DQ441431  | variola virus |
| DQ441433  | variola virus |
| DQ441446  | variola virus |
| DQ441445  | variola virus |
| DQ437580  | variola virus |
| DQ437581  | variola virus |
| DQ437583  | variola virus |
| DQ437585  | variola virus |
| DQ437586  | variola virus |
| DQ437587  | variola virus |
| DQ437588  | variola virus |
| DQ437589  | variola virus |
| DQ437592  | variola virus |
| DQ441417  | variola virus |
| DQ441418  | variola virus |
| DQ441420  | variola virus |
| DQ441421  | variola virus |
| DQ441422  | variola virus |
| DQ441423  | variola virus |
| DQ441427  | variola virus |
| DQ441435  | variola virus |



|          |               |
|----------|---------------|
| DQ441436 | variola virus |
| DQ441443 | variola virus |
| DQ441448 | variola virus |
| DQ441424 | variola virus |
| DQ441425 | variola virus |
| DQ441438 | variola virus |
| DQ441439 | variola virus |
| DQ441440 | variola virus |
| DQ441441 | variola virus |

---

**Supplementary Table 3. List of genes that are not or only partially covered by PIs.**

| <b>Alignment start</b> | <b>Alignment end</b> | <b>VACV WR start</b> | <b>VACV WR end</b> | <b>Annotated genes</b>                                                                                                                                                                                                                                                              |
|------------------------|----------------------|----------------------|--------------------|-------------------------------------------------------------------------------------------------------------------------------------------------------------------------------------------------------------------------------------------------------------------------------------|
| 1                      | 9137                 | 1                    | 4045               | VACWR001^                                                                                                                                                                                                                                                                           |
| 10398                  | 29711                | 5192                 | 10359              | VACWR004^, VACWR005, VACWR006, VACWR007, VACWR008^, VACWR009^, VACWR010, VACWR011^, VACWR012                                                                                                                                                                                        |
| 30272                  | 32557                | 10920                | 13096              | VACWR014, VACWR015, VACWR016, VACWR017, VACWR018                                                                                                                                                                                                                                    |
| 36607                  | 41591                | 17066                | 22023              | VACWR023, VACWR024, VACWR025, VACWR026, VACWR027, VACWR028                                                                                                                                                                                                                          |
| 42462                  | 45266                | 22893                | 25673              | VACWR030, VACWR031, VACWR032                                                                                                                                                                                                                                                        |
| 62320                  | 64313                | NA                   | NA                 | Foreign insertion in EU410304.1                                                                                                                                                                                                                                                     |
| 102929                 | 111609               | NA                   | NA                 | Foreign insertion in EU410304.1                                                                                                                                                                                                                                                     |
| 165996                 | 169922               | 135196               | 139050             | VACWR147, VACWR148                                                                                                                                                                                                                                                                  |
| 189812                 | 193610               | 158585               | 162186             | VACWR178, VACWR179, VACWR180                                                                                                                                                                                                                                                        |
| 194085                 | 196514               | NA                   | NA                 | Foreign insertion in EU410304.1                                                                                                                                                                                                                                                     |
| 205480                 | 206717               | NA                   | NA                 | Only present in MN369532                                                                                                                                                                                                                                                            |
| 215843                 | 237078               | 171646               | 189950             | VACWR192, VACWR193, VACWR194, VACWR195, VACWR196, VACWR197, VACWR198, VACWR199, VACWR200, VACWR201, VACWR202, VACWR203, VACWR204, VACWR204.5, VACWR205, VACWR206, VACWR207, VACWR208^, VACWR209^, VACWR210^, VACWR211^, VACWR212, VACWR213, VACWR214, VACWR215^, VACWR216, VACWR217 |
| 237344                 | 246283               | 190178               | 194711             | VACWR218^                                                                                                                                                                                                                                                                           |

^ Denotes genes within inverted terminal repeats (ITRs).
